# Supplementary material for: Calculations of theoretical efficiencies for electrochemically-mediated tandem solar water splitting as a function of bandgap energies and redox shuttle potential
Source: Royal Society of Chemistry journal article supplement (doi:10.1039/c8ee01828f), 2018-10-16
Supplement: c8ee01828f1.pdf [file c8ee01828f1.pdf]

**Supplementary Information for**  
**Calculations of Theoretical Efficiencies for Electrochemically-Mediated**  
**Tandem Solar Water Splitting as a Function of Bandgap Energies and Redox**  
**Shuttle Potential**

Sam Keene,<sup>a</sup> Rohini Bala Chandran,<sup>b</sup> and Shane Ardo<sup>c,d\*</sup>

<sup>a</sup> Department of Physics, University of California Irvine, Irvine, CA 92697-2025 USA

<sup>b</sup> Department of Mechanical Engineering, University of Michigan, Ann Arbor, MI 48109-2125 USA

<sup>c</sup> Department of Chemistry, University of California Irvine, Irvine, CA 92697-2025 USA

<sup>d</sup> Department of Chemical Engineering and Materials Science, University of California Irvine, Irvine, CA  
92697-2025 USA

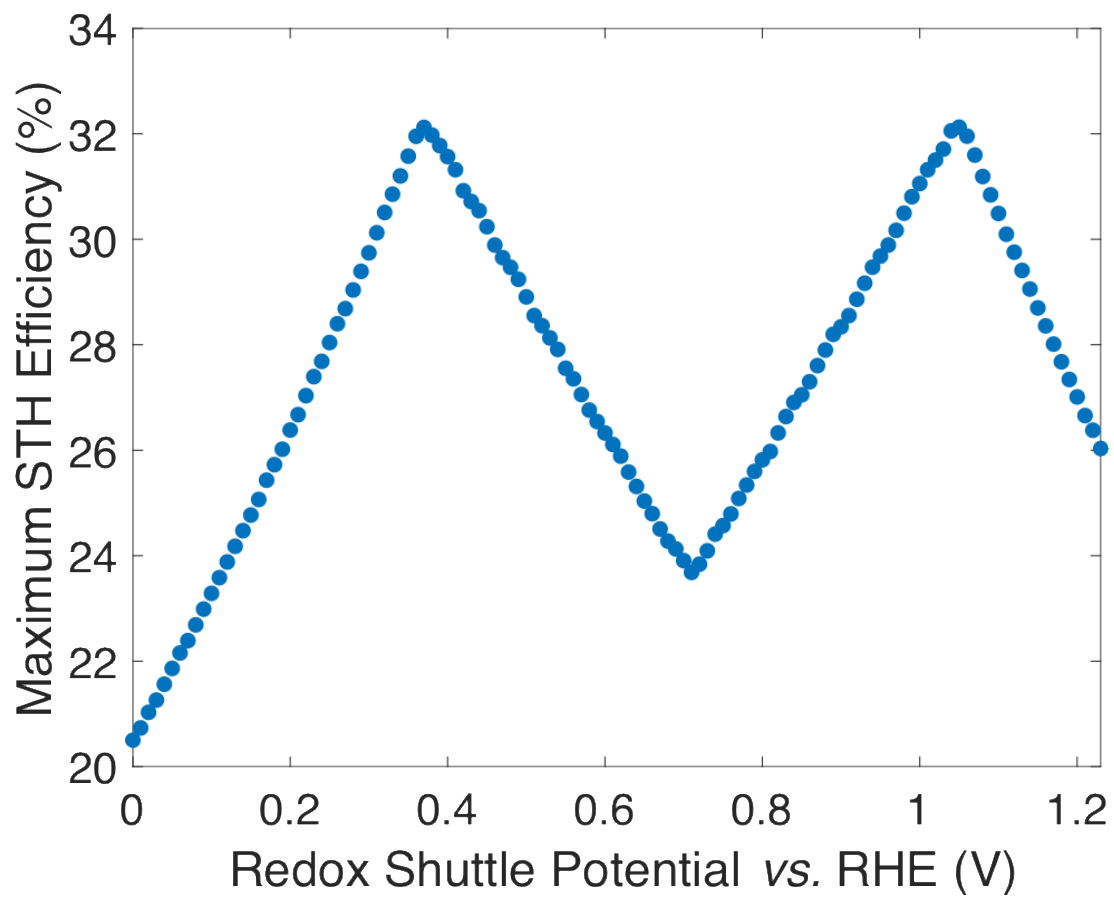

**Figure S1.** Maximum STH efficiency vs.  $E_{\text{shuttle}}$  assuming ideal electrocatalytic parameters and using an incident spectrum of a blackbody at 5800 K instead of the solar spectrum.

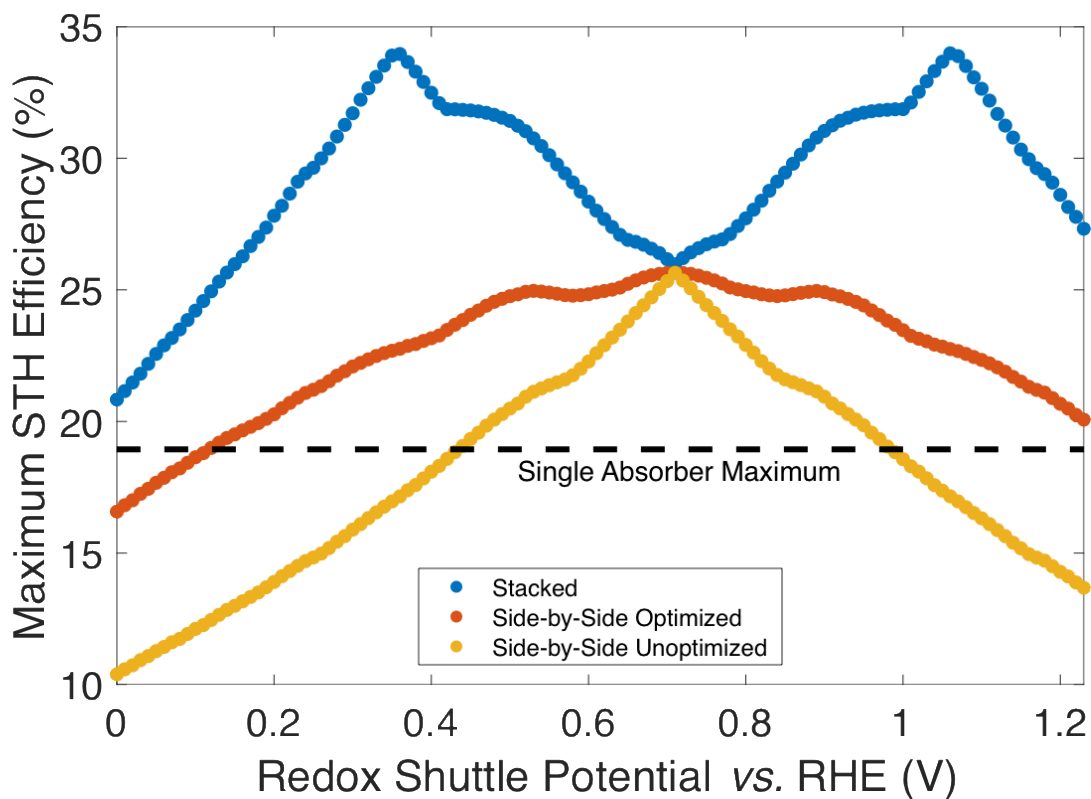

**Figure S2.** Maximum STH efficiency vs.  $E_{\text{shuttle}}$  assuming ideal electrocatalytic parameters for a stacked tandem design, a side-by-side tandem design with the relative area of the two light-absorbers optimized, and a side-by-side tandem design with an equal (unoptimized) relative area of the two light-absorbers.

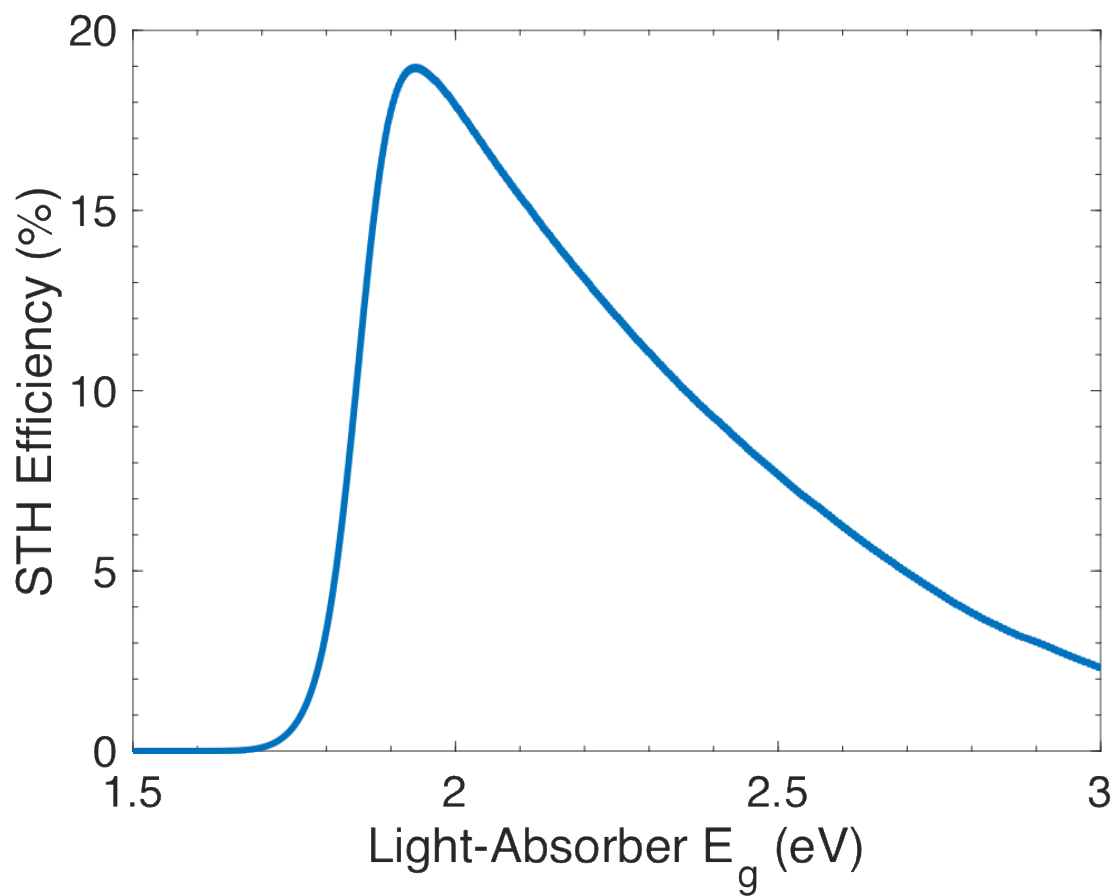

**Figure S3.** STH efficiency vs. light-absorber bandgap for the design in which a single light-absorber drives the OER and the HER (i.e. overall water electrolysis).

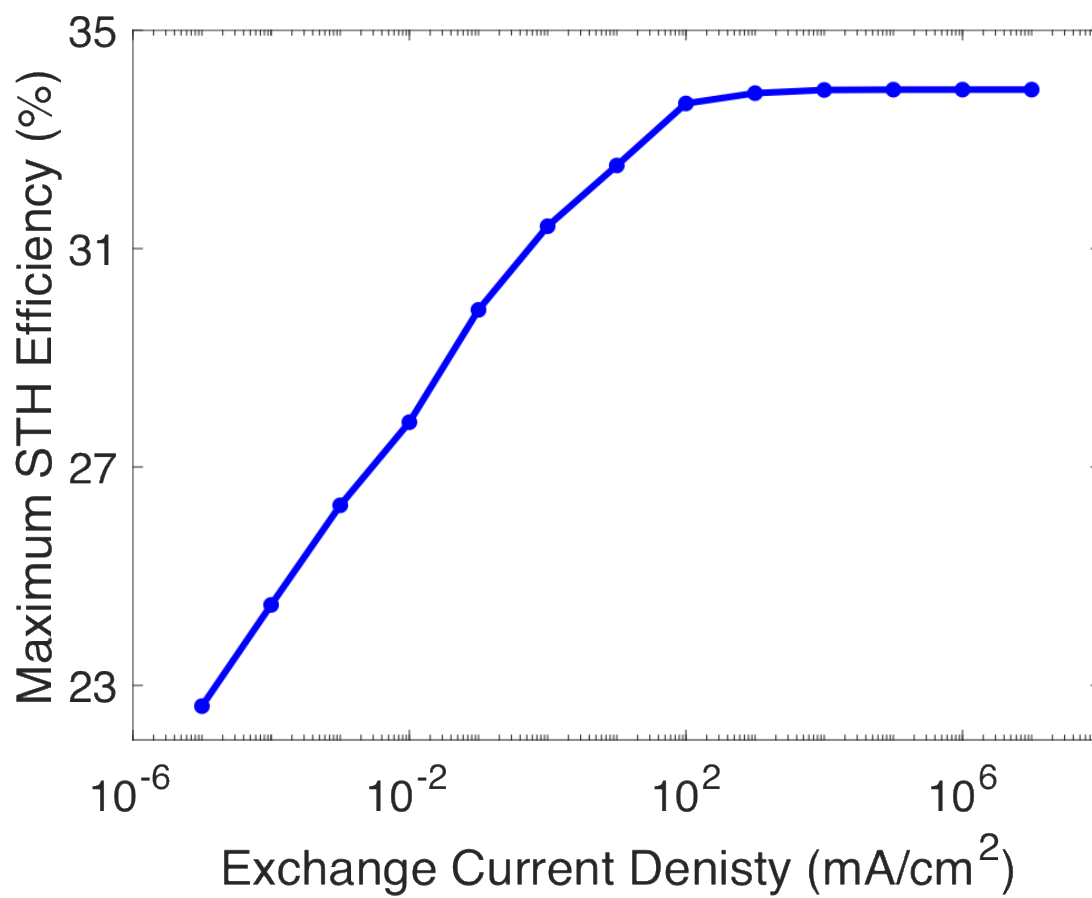

**Figure S4.** Global maximum STH efficiency vs. exchange current density for the redox shuttle reactions.
